# Supplementary material for: HGF-induced migration depends on the PI(3,4,5)P3-binding microexon-spliced variant of the Arf6 exchange factor cytohesin-1
Source: PubMed Central journal article supplement — J Cell Biol. 2019 Jan 7;218(1):285–98. doi: 10.1083/jcb.201804106 (PMC6314551; doi:10.1083/jcb.201804106), 2019-01-07
Supplement: JCB_201804106_sm.pdf [file JCB_201804106_sm.pdf]

Supplemental material

Ratcliffe et al., <https://doi.org/10.1083/jcb.201804106>

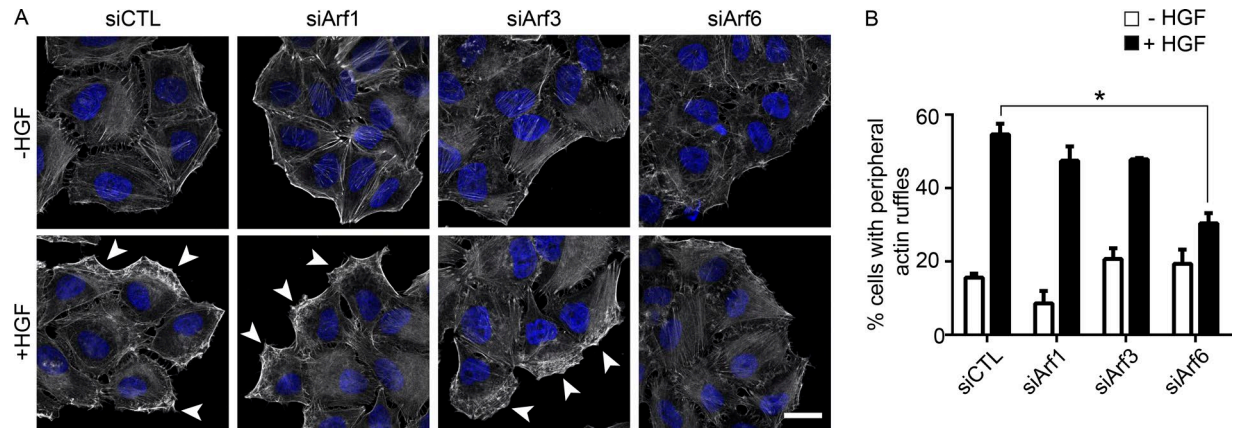

Figure S1. **Arf6 regulates HGF-dependent actin remodeling.** (A) Confocal images of HeLa cells counterstained with phalloidin (F-actin) and DAPI and treated with or without HGF. (B) Quantification of experiments shown in A. Scale bar, 20  $\mu$ m. Arrowheads indicate peripheral membrane ruffles. All quantified data indicate mean  $\pm$  SEM from three independent experiments. \*,  $P < 0.05$ .

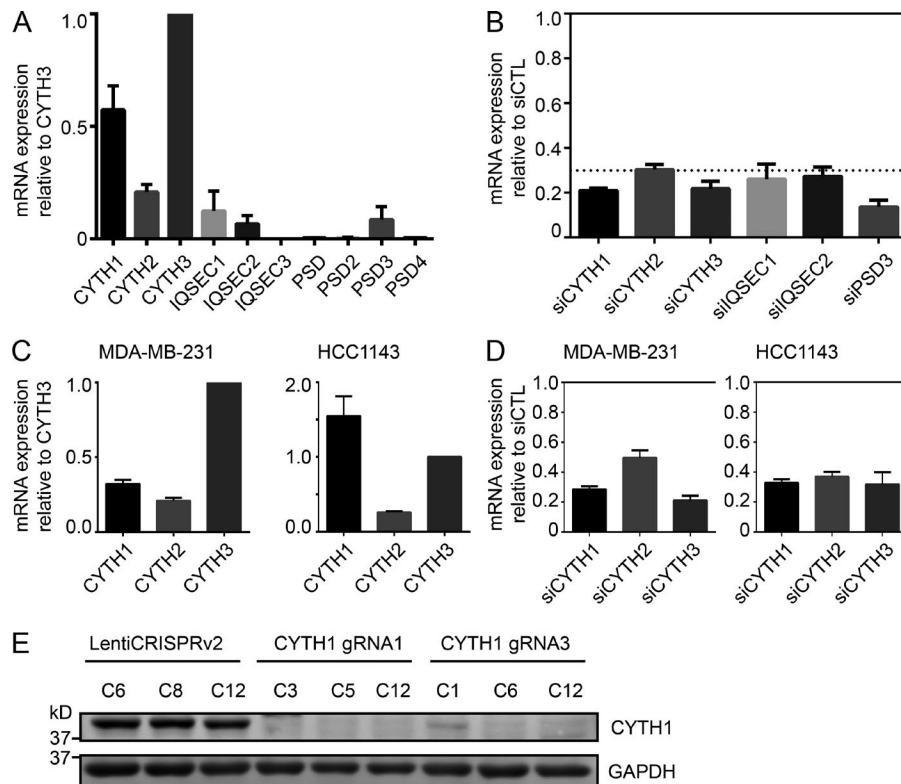

Figure S2. **Expression and depletion of Arf GEFs and cytohesin-1 isoforms and mutants in HeLa cells.** (A) Relative levels of known Arf GEFs from HeLa cell lysates measured by quantitative RT-PCR. (B) Relative levels of siRNA-mediated depletion of Arf GEFs expressed in HeLa cells measured by quantitative RT-PCR. (C) Relative levels of cytohesin family members from MDA-MB-231 and HCC1143 cell lysates measured by quantitative RT-PCR. (D) Relative levels of siRNA-mediated depletion of cytohesin family members in MDA-MB-231 and HCC1143 cells measured by quantitative RT-PCR. (E) Western blot analysis of cytohesin-1 protein levels in empty vector or CYTH1 gRNA expressing DO clones generated using the CRISPR/Cas9 LentiCRISPR v2 system. All quantified data indicate mean  $\pm$  SEM from three independent experiments.

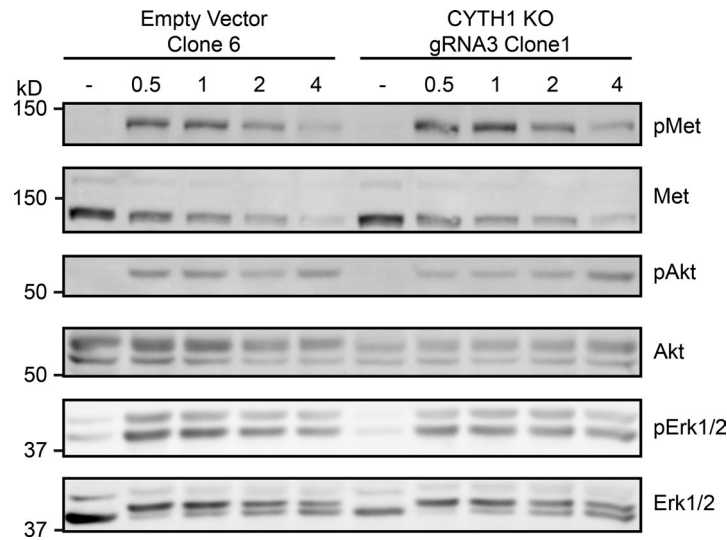

Figure S3. **CYTH1 KO does not affect Met stability or HGF-dependent Akt or Erk1/2 signaling.** Control or CYTH1 KO cells were stimulated with HGF in the presence of cycloheximide for the times indicated. Western blot of lysates is shown.

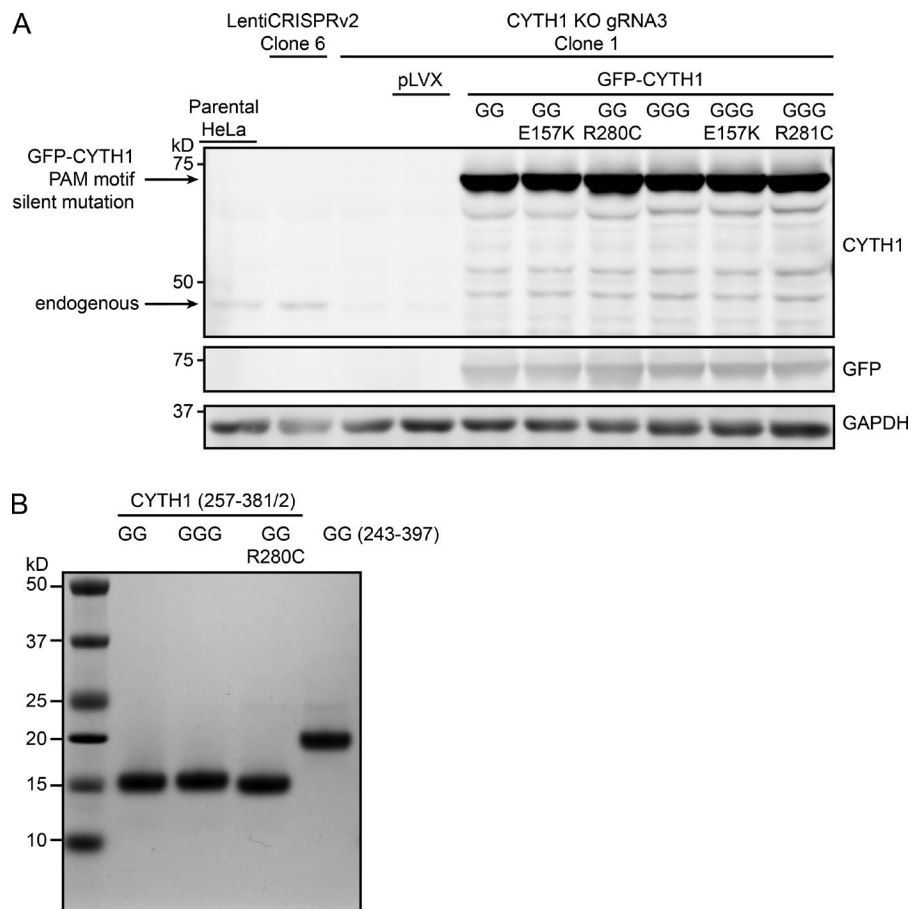

Figure S4. **Expression of cytohesin-1 isoforms and mutants.** (A) Western blot analysis of populations of expressing Cas9-resistant EGFP-CYTH1 isoforms (diglycine GG or triglycine GGG) and mutants were generated from CYTH1 KO gRNA3 clone 1. (B) Purification of cytohesin-1 PH domain variants. Coomassie-stained acrylamide gel of purified cytohesin-1 PH domain variants.

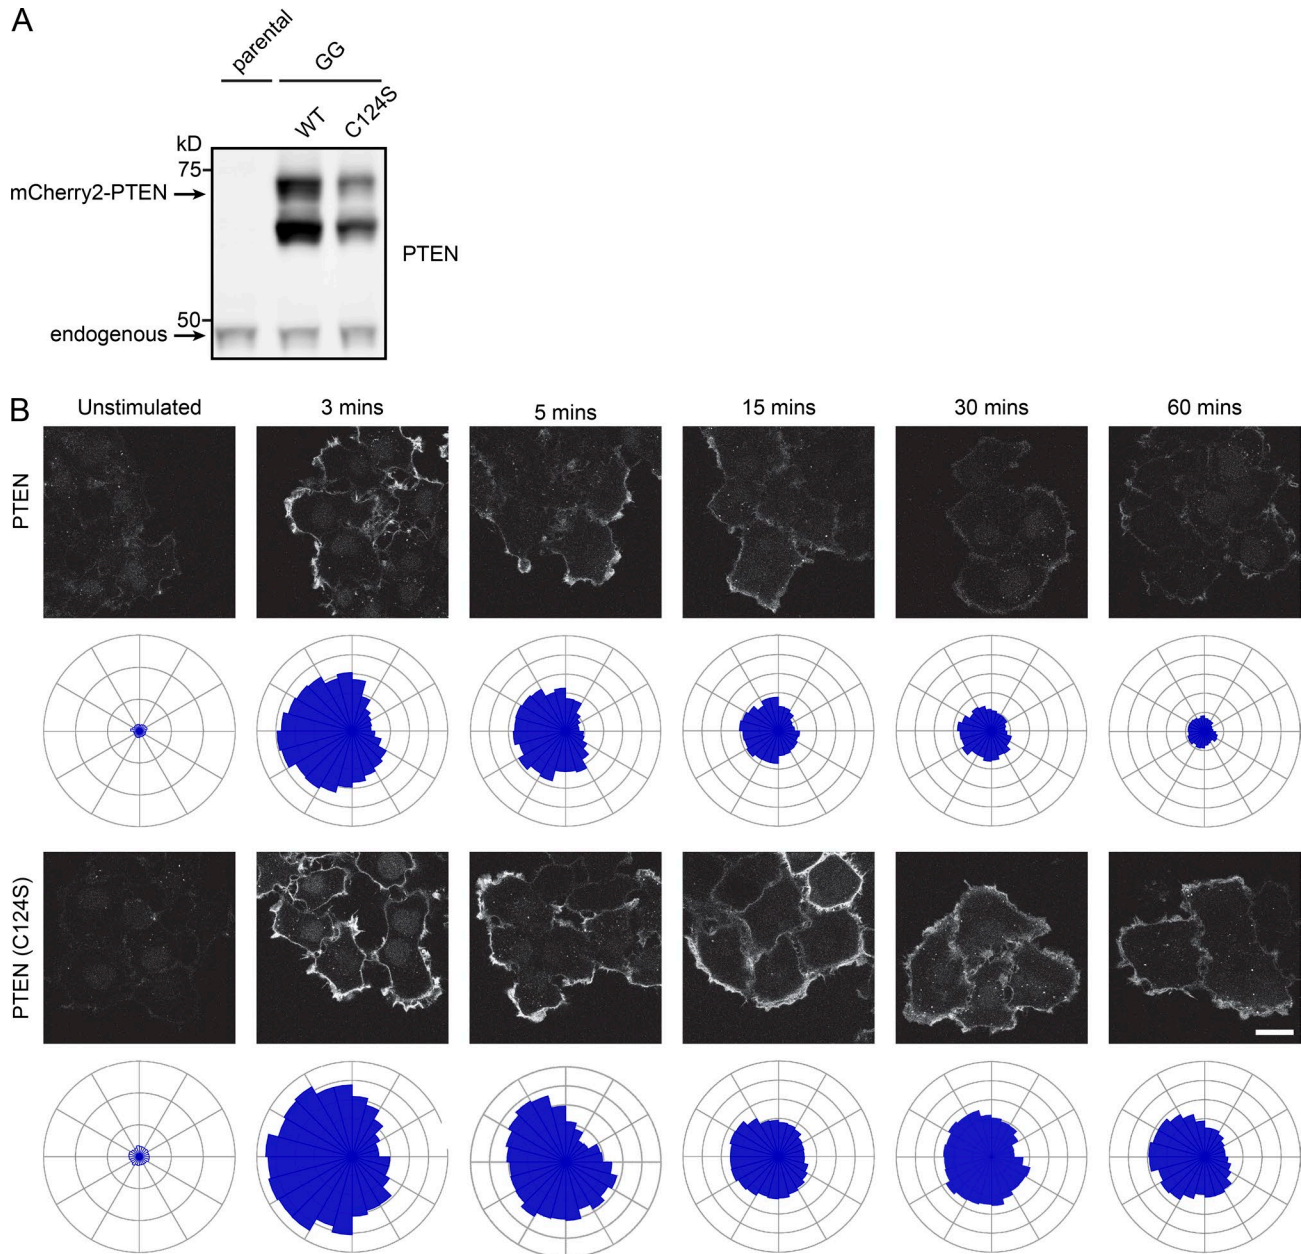

Figure S5. **PTEN activity attenuates diglycine cytohesin-1 membrane recruitment.** (A) Western blot analysis of cells expressing mCherry2-PTEN WT or C124S mutant. (B) HeLa cells stably expressing EGFP-tagged diglycine CYTH1 and mCherry-PTEN were either not treated (-, unfilled) or treated (+, filled) with HGF for the indicated time points, permeabilized with ice-cold 0.05% saponin in Pipes buffer and imaged by confocal microscopy. Scale bar, 20  $\mu$ m.

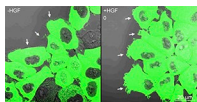

Video 1. **Diglycine EGFP-CYTH1 localizes to the plasma membrane in response to HGF.** HeLa cells stably expressing EGFP-tagged diglycine CYTH1 were either untreated or treated with HGF for 15 min, permeabilized with ice-cold 0.05% saponin in Pipes buffer, and imaged by confocal microscopy. Transmitted light and confocal fluorescence images were captured every 4 s for 40 s after addition of permeabilization buffer, overlaid, and displayed at 1/5 s per frame. Scale bar, 20  $\mu$ m.
